# Supplementary material
Source: publisher figshare collection journal article supplement (https://acs.figshare.com/ndownloader/files/32070007)
Supplement: Supplementary file 1 [file 32070007]

## Supporting Information

# 3D Urchin-like Hierarchical Black TiO<sub>2</sub> Hollow Nanospheres: A Highly Active and Stable Electrocatalyst for Water Oxidation in Alkaline and Neutral Medium

*Raji Vadakkekara,\* †,‡ Sandesh R. Jadkar \* †,‡*

† School of Energy Studies, Savitribai Phule Pune University, Pune - 411007, Maharashtra,

India

‡ Department of Physics, Savitribai Phule Pune University, Pune - 411007, Maharashtra, India

\*Corresponding authors: [rajisvnit@gmail.com](mailto:rajisvnit@gmail.com); [sandesh@physics.unipune.ac.in](mailto:sandesh@physics.unipune.ac.in)

**Turnover frequency (TOF) calculation:**

The TOF value was calculated using the equation 1. <sup>1</sup>

$$TOF = \frac{J \times A}{4 \times F \times m} \quad (1)$$

$J$  = current density at fixed overpotential

$A$  = area of the glassy carbon electrode (0.0706 cm<sup>2</sup>)

$F$  = faraday constant (96485 C mol<sup>-1</sup>)

$m$  = number of moles of the catalyst deposited onto glassy carbon electrode

The ECSA was calculated according to the equation 2. <sup>2</sup>

$$ECSA = \frac{C_{dl}}{C_s} \quad (2)$$

$C_{dl}$  = double layer capacitance

$C_s$  = specific capacitance

The faradaic efficiency ( $\epsilon$ ) of the OER system is proportional to the ratio of the ring current to

the disk current and was calculated by using the equation 3. <sup>2</sup>

$$\text{Faradaic efficiency} = \frac{2 \times I_r}{I_d \times N} \quad (3)$$

where,  $I_r$  = ring current

$I_d$  = disk current

$N$  = collection efficiency (0.37)

Mass activity was calculated according to the equation 4. <sup>2</sup>

$$\text{Mass activity} = \frac{\text{current density at a fixed potential}}{\text{catalytic loading}} \quad (4)$$

### Calibration of Hg/HgO

LSV was obtained for converting the electrode potentials into the reversible hydrogen electrode (RHE) scale. LSV (Figure S1) has been recorded in  $H_2$ -saturated 1 M KOH solution at a scan rate of  $1 \text{ mVs}^{-1}$  with Pt as the working electrode, graphite rod as the counter electrode and Hg/HgO as the reference electrode.<sup>2</sup> The correction factor obtained was 0.912, where the current crosses the zero line.

$$\text{So, } E(\text{RHE}) = E(\text{Hg/HgO}) + 0.912 \quad (5)$$

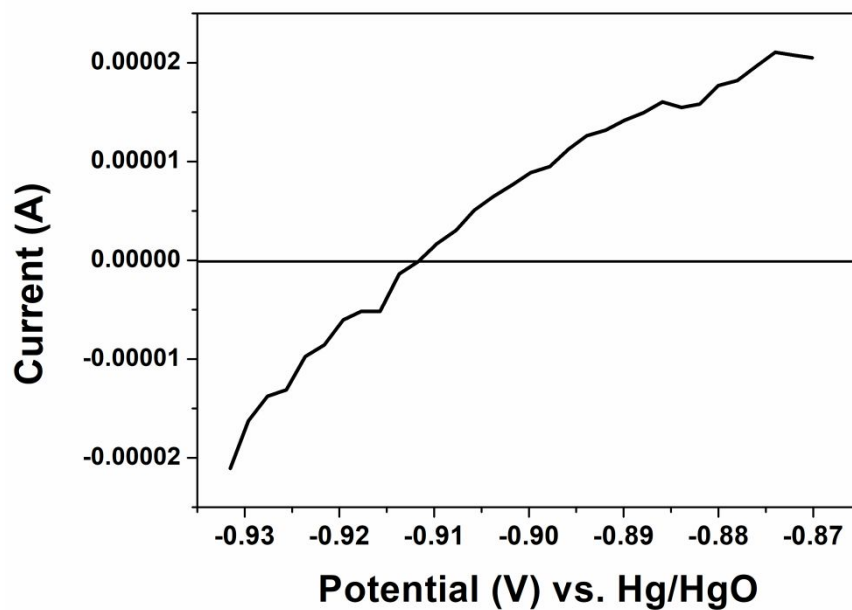

**Figure S1.** LSV for Hg/HgO to RHE calibration in H<sub>2</sub>-saturated 1 M KOH solution recorded at a scan rate of 1 mVs<sup>-1</sup>.

In alkaline medium, OER process follows four step reaction mechanisms.

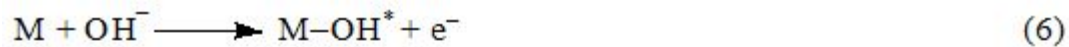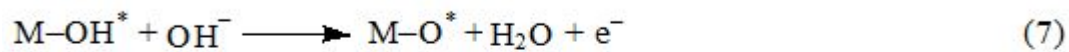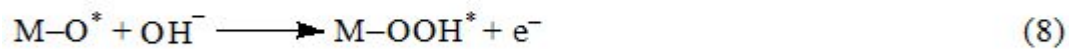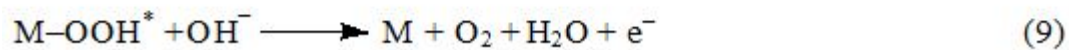

## REFERENCES

- (1) Yu, L.; Zhu, Q.; Song, S.; McElhenny, B.; Wang, D.; Wu, C.; Qin, Z.; Bao, J.; Yu, Y.; Chen, S.; Ren, Z. Non-Noble Metal-Nitride Based Electrocatalysts for High-Performance Alkaline Seawater Electrolysis. *Nat. Comm.* **2019**, *10*, 5106.
- (2) Vadakkekara, R.; Illathvalappil, R.; Kurungot, S. Layered TiO<sub>2</sub> Nanosheet-Supported NiCo<sub>2</sub>O<sub>4</sub> Nanoparticles as an Efficient Bi-Functional Electrocatalyst for Overall Water Splitting. *ChemElectroChem* **2018**, *5*(24), 4000-4007.
